# Supplementary material for: Genetics Contributes to Concomitant Pathology and Clinical Presentation in Dementia with Lewy Bodies
Source: PubMed Central journal article supplement — J Alzheimers Dis. 2021 Aug 31;83(1):269–79. doi: 10.3233/JAD-210365 (PMC8461715; doi:10.3233/jad-210365), 2021-08-31
Supplement: jad-83-jad210365-s001.pdf [file jad-83-jad210365-s001.pdf]

# Supplementary Material

## Genetics Contributes to Concomitant Pathology and Clinical Presentation in Dementia with Lewy Bodies

**Supplementary Table 1. Cohort characteristics controls**

|                                   | <b>Controls LASA<br/>(n=1648)</b> | <b>Controls ADC<br/>(n=867)</b> | <b>Controls NBB<br/>(n=37)</b> |
|-----------------------------------|-----------------------------------|---------------------------------|--------------------------------|
| Female (n. %)                     | 876 (53.2)                        | 345 (39.1%)                     | 21 (58.3%)                     |
| Age                               | 62.8 (6.4)                        | 59.8 (8.9)                      | 81.5 (11.2)                    |
| MMSE                              | 27.9 (2.1)                        | 28.2 (1.7)                      | -                              |
| CSF biomarkers <sup>§</sup>       |                                   |                                 |                                |
| A $\beta$ <sub>1-42</sub> (pg/ml) | -                                 | 1087 (236)                      | -                              |
| tau (pg/ml)                       | -                                 | 282 (159)                       | -                              |
| p-tau (pg/ml)                     | -                                 | 47.6 (21)                       | -                              |

Data are presented as mean (SD) or n (%). ADC, Amsterdam Dementia Cohort; CSF, cerebrospinal fluid; GDS, Geriatric Depression Scale; LASA, Longitudinal Aging Study Amsterdam; MMSE, Mini-Mental State Examination; NBB, Netherlands Brain Bank; p-tau, tau phosphorylated at threonine 181.

**Supplementary Table 2.** Variants included in the AD polygenic risk score. The reported was extracted from the GWAS for AD and the sign of the effect was corrected that is matched the Effect\_allele of the HRC reference panel. MAF, minor allele frequency; Rsq, Imputation quality. See Excel file.

**Supplementary Table 3.** Variants included in the PD polygenic risk score. Variants included in the PD polygenic risk score. The reported was extracted from the GWAS for AD and the sign of the effect was corrected that is matched the Effect\_allele of the HRC reference panel. See Excel file.

**Supplementary Table 4.** Allele counts and frequencies in all groups

| Gene (variant position)      | Non risk allele / risk allele | Group         | Frequency non-risk allele | Frequency risk allele | N total | No risk allele (%) | One risk alleles (%) | Two risk alleles (%) |
|------------------------------|-------------------------------|---------------|---------------------------|-----------------------|---------|--------------------|----------------------|----------------------|
| <i>APOE</i><br>(19:45411941) | T / C                         | DLB-All       | 66.1                      | 33.9                  | 190     | 83 (43.7)          | 85 (44.7)            | 22 (11.6)            |
|                              |                               | DLB-AD        | 58.5                      | 41.5                  | 82      | 27 (32.9)          | 42 (51.2)            | 13 (15.9)            |
|                              |                               | DLB-pure      | 77.1                      | 22.9                  | 72      | 42 (58.3)          | 27 (37.5)            | 3 (4.2)              |
|                              |                               | Controls      | 82.7                      | 17.3                  | 2552    | 1746 (68.4)        | 729 (28.6)           | 77 (3)               |
|                              |                               | Controls LASA | 84                        | 16                    | 1648    | 1158 (70.3)        | 453 (27.5)           | 37 (2.2)             |
|                              |                               | Controls ADC  | 80.2                      | 19.8                  | 867     | 562 (64.8)         | 266 (30.7)           | 39 (4.5)             |
|                              |                               | Controls NBB  | 82.9                      | 17.1                  | 35      | 24 (68.6)          | 10 (28.6)            | 1 (2.9)              |
| <i>GBA</i><br>(1:155206167)  | C / G                         | DLB-All       | 90.5                      | 9.5                   | 190     | 158 (83.2)         | 28 (14.7)            | 4 (2.1)              |
|                              |                               | DLB-AD        | 93.9                      | 6.1                   | 82      | 72 (87.8)          | 10 (12.2)            | 0 (0)                |
|                              |                               | DLB-pure      | 83.3                      | 16.7                  | 72      | 52 (72.2)          | 16 (22.2)            | 4 (5.6)              |
|                              |                               | Controls      | 97.9                      | 2.1                   | 2552    | 2448 (95.9)        | 100 (3.9)            | 4 (0.2)              |
|                              |                               | Controls LASA | 97.8                      | 2.2                   | 1648    | 1579 (95.8)        | 67 (4.1)             | 2 (0.1)              |
|                              |                               | Controls ADC  | 97.9                      | 2.1                   | 867     | 833 (96.1)         | 32 (3.7)             | 2 (0.2)              |
|                              |                               | Controls NBB  | 98.6                      | 1.4                   | 35      | 34 (97.1)          | 1 (2.9)              | 0 (0)                |
| <i>SNCA</i><br>(4:90756550)  | C / G                         | DLB-All       | 36.6                      | 63.4                  | 190     | 28 (14.7)          | 83 (43.7)            | 79 (41.6)            |
|                              |                               | DLB-AD        | 37.8                      | 62.2                  | 82      | 13 (15.9)          | 36 (43.9)            | 33 (40.2)            |
|                              |                               | DLB-pure      | 36.1                      | 63.9                  | 72      | 13 (18.1)          | 26 (36.1)            | 33 (45.8)            |
|                              |                               | Controls      | 44                        | 56                    | 2552    | 504 (19.7)         | 1240 (48.6)          | 808 (31.7)           |
|                              |                               | Controls LASA | 43.7                      | 56.3                  | 1648    | 328 (19.9)         | 785 (47.6)           | 535 (32.5)           |
|                              |                               | Controls ADC  | 44.9                      | 55.1                  | 867     | 170 (19.6)         | 438 (50.5)           | 259 (29.9)           |
|                              |                               | Controls NBB  | 38.6                      | 61.4                  | 35      | 5 (14.3)           | 17 (48.6)            | 13 (37.1)            |

Controls ADC, Controls from Amsterdam Dementia Cohort; *APOE*, Apolipoprotein E; *GBA*, Glucocerebrosidase; Controls LASA, Controls from Longitudinal Aging of Amsterdam Study; Controls NBB, controls from Netherlands Brain Bank; *SNCA*, Alpha-synuclein.

**Supplementary Table 5.** Single variant associations of the variants included in the AD polygenic risk score. The effect is reported for the effect allele, this is not necessarily the minor allele. See Excel file.

**Supplementary Table 6.** Single variant associations of the variants included in the PD polygenic risk score. The effect is reported for the effect allele, this is not necessarily the minor allele. See Excel file.

**Supplementary Table 7.** Interaction effect of genetic variants with presence of amyloid pathology.

| Association with | Gene or PRS | Beta  | p     | $p_{fdr}$ | N   |
|------------------|-------------|-------|-------|-----------|-----|
| Age              | <i>APOE</i> | 0.10  | 0.957 | 0.985     | 154 |
|                  | <i>GBA</i>  | 1.69  | 0.508 | 0.854     | 154 |
|                  | <i>SNCA</i> | -1.04 | 0.500 | 0.854     | 154 |
|                  | AD-PRS      | 1.78  | 0.136 | 0.794     | 154 |
|                  | PD-PRS      | 2.65  | 0.019 | 0.169     | 154 |
| MMSE             | <i>APOE</i> | -0.48 | 0.683 | 0.888     | 153 |
|                  | <i>GBA</i>  | 1.29  | 0.479 | 0.854     | 153 |
|                  | <i>SNCA</i> | 2.54  | 0.011 | 0.127     | 153 |
|                  | AD-PRS      | -2.29 | 0.004 | 0.081     | 153 |
|                  | PD-PRS      | 0.11  | 0.882 | 0.935     | 153 |
| Parkinsonism     | <i>APOE</i> | 0.04  | 0.736 | 0.902     | 149 |
|                  | <i>GBA</i>  | -0.13 | 0.485 | 0.854     | 149 |
|                  | <i>SNCA</i> | -0.10 | 0.336 | 0.854     | 149 |
|                  | AD-PRS      | -0.03 | 0.685 | 0.888     | 149 |
|                  | PD-PRS      | -0.08 | 0.321 | 0.854     | 149 |
| Hallucinations   | <i>APOE</i> | 0.08  | 0.526 | 0.854     | 152 |
|                  | <i>GBA</i>  | 0.00  | 0.997 | 0.997     | 152 |
|                  | <i>SNCA</i> | 0.08  | 0.480 | 0.854     | 152 |
|                  | AD-PRS      | -0.06 | 0.450 | 0.854     | 152 |
|                  | PD-PRS      | -0.05 | 0.574 | 0.854     | 152 |
| Fluctuations     | <i>APOE</i> | 0.03  | 0.747 | 0.902     | 132 |
|                  | <i>GBA</i>  | 0.10  | 0.557 | 0.854     | 132 |
|                  | <i>SNCA</i> | -0.02 | 0.840 | 0.935     | 132 |
|                  | AD-PRS      | -0.19 | 0.005 | 0.081     | 132 |
|                  | PD-PRS      | 0.11  | 0.082 | 0.574     | 132 |
| REM sleep        | <i>APOE</i> | -0.04 | 0.774 | 0.904     | 116 |
|                  | <i>GBA</i>  | 0.13  | 0.549 | 0.854     | 116 |
|                  | <i>SNCA</i> | 0.09  | 0.470 | 0.854     | 116 |
|                  | AD-PRS      | -0.09 | 0.348 | 0.854     | 116 |
|                  | PD-PRS      | -0.02 | 0.863 | 0.935     | 116 |
| mortality        | <i>APOE</i> | 0.17  | 0.618 | 0.865     | 153 |
|                  | <i>GBA</i>  | -0.26 | 0.585 | 0.854     | 153 |
|                  | <i>SNCA</i> | 0.16  | 0.582 | 0.854     | 153 |
|                  | AD-PRS      | 0.21  | 0.343 | 0.854     | 153 |
|                  | PD-PRS      | 0.12  | 0.572 | 0.854     | 153 |

p is the p-value for the interaction between the variant and concomitant AD pathology.  $p_{fdr}$  is the fdr adjusted p-value. *APOE*, Apolipoprotein E; *GBA*, Glucocerebrosidase; MMSE, Mini-Mental State Examination; RBD, rapid eye movement (REM) sleep behavior disorder; *SNCA*, Alpha-synuclein.
